# Supplementary material for: PLGA/PEG Nanoparticles Loaded with Cyclodextrin-Peganum harmala Alkaloid Complex and Ascorbic Acid with Promising Antimicrobial Activities
Source: MDPI journal article supplement (doi:10.3390/pharmaceutics14010142), 2022-01-07
Supplement: s1 [file s1]

# PLGA/PEG Nanoparticles Loaded with Cyclodextrin-*Peganum harmala* Alkaloid Complex and Ascorbic Acid with Promising Antimicrobial Activities

Sherif Ashraf Fahmy , Noha Khalil Mahdy , Hadeer Al Mulla , Aliaa Nabil ElMeshad , Marwa Y. Issa and Hassan Mohamed El-Said Azzazy

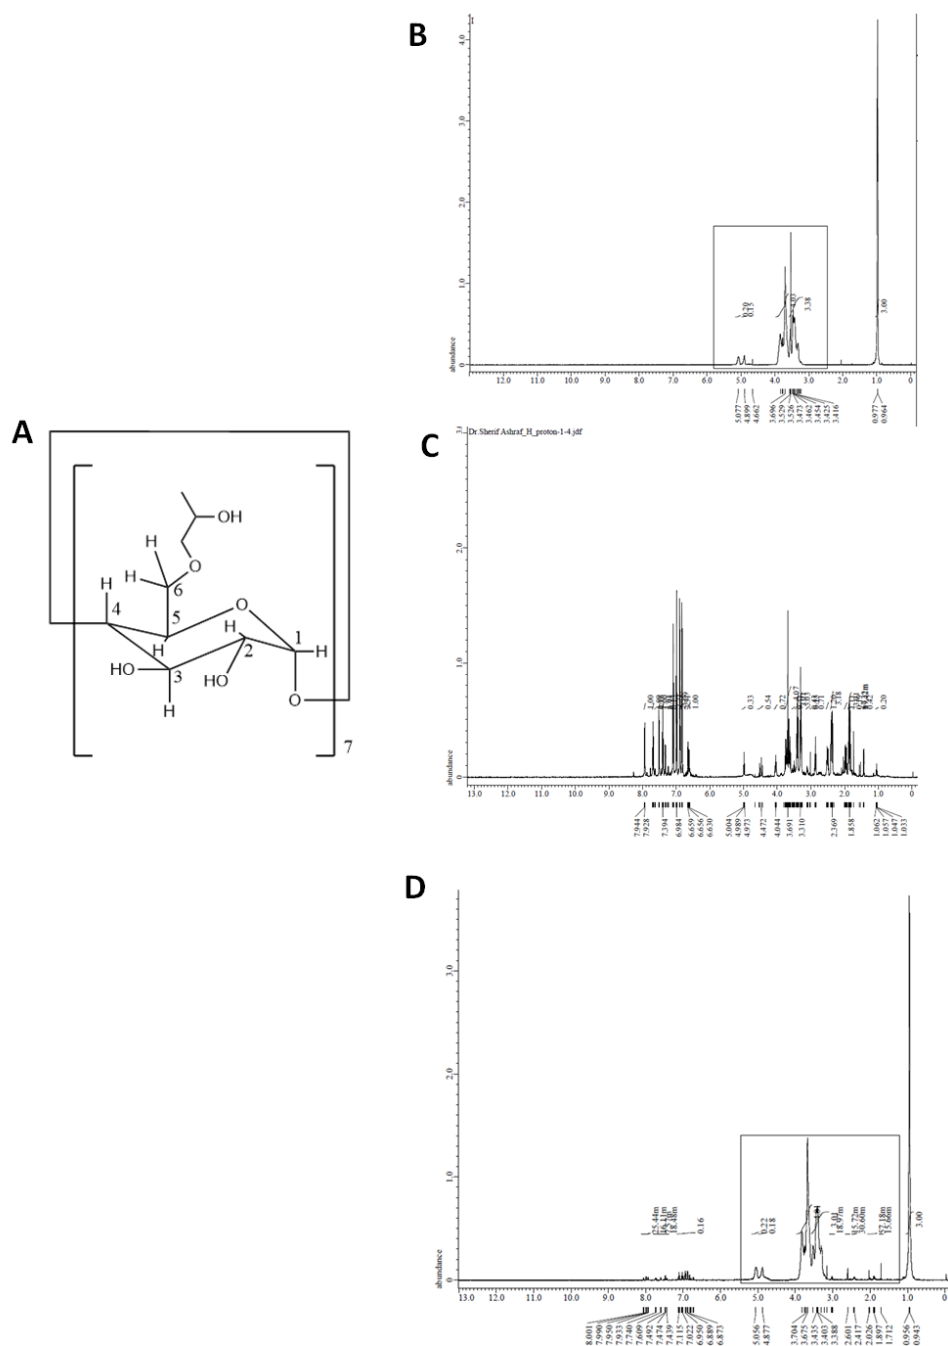

**Figure S1.** (A) Structure of HPβCD with appropriate protons numbered. <sup>1</sup>H NMR spectra of (B) HPβCD, (C) HARE, and (D) HARE-HPβCD complex.
